1 **Antiviral activity of influenza A virus defective interfering**  
2 **particles against SARS-CoV-2 replication *in vitro* through**  
3 **stimulation of innate immunity**

4 Rand U.<sup>1,\*</sup>, Kupke S.Y.<sup>2,\*,#</sup>, Shkarlet H.<sup>3,4,\*</sup>, Hein M.D.<sup>5</sup>, Hirsch T.<sup>3</sup>, Marichal-Gallardo  
5 P.<sup>2</sup>, Cicin-Sain L.<sup>1,6</sup>, Udo Reichl<sup>2,5</sup>, Bruder D.<sup>3,4</sup>

6

7 <sup>1</sup>Department of Vaccinology and Applied Microbiology, Helmholtz Centre for Infection  
8 Research, Braunschweig, Germany

9 <sup>2</sup>Bioprocess Engineering, Max Planck Institute for Dynamics of Complex Technical  
10 Systems, Magdeburg, Germany

11 <sup>3</sup>Immune Regulation, Helmholtz Centre for Infection Research, Braunschweig,  
12 Germany

13 <sup>4</sup>Institute of Medical Microbiology, Infection Prevention and Control, Infection  
14 Immunology Group, Health Campus Immunology, Infectiology and Inflammation,  
15 Otto von Guericke University Magdeburg, Magdeburg, Germany

16 <sup>5</sup>Bioprocess Engineering, Otto von Guericke University Magdeburg, Magdeburg,  
17 Germany

18 <sup>6</sup>German Centre for Infection Research, Hannover-Braunschweig Site, Braunschweig,  
19 Germany

20

21 \*First author

22 #Correspondence: [kupke@mpi-magdeburg.mpg.de](mailto:kupke@mpi-magdeburg.mpg.de)

## 23 **Abstract**

24 SARS-CoV-2 causing COVID-19 emerged in late 2019 and resulted in a devastating  
25 pandemic. Although the first approved vaccines were already administered by the  
26 end of 2020, vaccine availability is still limited. Moreover, immune escape variants of  
27 the virus are emerging against which the current vaccines may confer only limited  
28 protection. Further, existing antivirals and treatment options against COVID-19 only  
29 show limited efficacy. Influenza A virus (IAV) defective interfering particles (DIPs)  
30 were previously proposed not only for antiviral treatment of the influenza disease but  
31 also for pan-specific treatment of interferon (IFN)-sensitive respiratory virus  
32 infections. To investigate the applicability of IAV DIPs as an antiviral for the  
33 treatment of COVID-19, we conducted *in vitro* co-infection experiments with  
34 produced, cell culture-derived DIPs and the IFN-sensitive SARS-CoV-2. We show that  
35 treatment with IAV DIPs leads to complete abrogation of SARS-CoV-2 replication.  
36 Moreover, this inhibitory effect was dependent on janus kinase/signal transducers  
37 and activators of transcription (JAK/STAT) signaling. These results suggest an  
38 unspecific stimulation of the innate immunity by IAV DIPs as a major contributor in  
39 suppressing SARS-CoV-2 replication. Thus, we propose IAV DIPs as an effective  
40 antiviral agent for treatment of COVID-19, and potentially also for suppressing the  
41 replication of new variants of SARS-CoV-2.

42

43 **Keywords:** SARS-CoV-2, COVID-19, antiviral, influenza A virus, defective interfering  
44 particles, OP7, DI244

## 45 **Introduction**

46 Severe acute respiratory syndrome coronavirus 2 (SARS-CoV-2), causing coronavirus  
47 disease 2019 (COVID-19), poses a severe burden to public health, economy and  
48 society. To date, almost 2.5 million cases of deaths were reported in the context of  
49 SARS-CoV-2 infection (WHO, [covid19.who.int](https://covid19.who.int)). Starting early 2020, there has been a  
50 unprecedented race for the development of novel vaccines, their production, and  
51 safety and immunogenicity studies in clinical trials (Krammer, 2020, Walsh et al.,  
52 2020, Voysey et al., 2020, Jackson et al., 2020, Logunov et al., 2020, Palacios et al.,  
53 2020). First individuals were already vaccinated at the end of 2020. While vaccination  
54 typically provides the best protection against virus infections and disease onset, the  
55 production capacity of COVID-19 vaccines, and the infrastructure required for  
56 vaccination is still limiting. In addition, vaccination cannot be used for therapeutic  
57 treatment of acute infections. Therefore, as an alternative option, the use of  
58 antivirals for treatment of COVID-19 is essential. Yet, remdesivir (in clinical use)  
59 showed only limited efficacy (Wang et al., 2020, Beigel et al., 2020, Pan et al.,  
60 2020), while other repurposed drug candidates (e.g., hydroxychloroquine and  
61 lopinavir-ritonavir) showed a lack of efficacy (Boulware et al., 2020, Cao et al.,  
62 2020). In addition, corticosteroids (i.e., dexamethasone (Tomazini et al., 2020)) and  
63 cocktails of monoclonal antibodies (e.g., bamlanivimab (Chen et al., 2020b)) are  
64 used in the clinic and show an antiviral effect. However, the appearance of new  
65 SARS-CoV-2 variants poses a constant risk to lose efficacy of highly specific  
66 treatments, including vaccination and therapeutic antibodies. Thus, there is a need to  
67 develop more broadly acting, cost-effective antivirals that ideally are easily scalable  
68 in production.

69 Influenza A virus (IAV) defective interfering particles (DIPs) were previously  
70 proposed for antiviral treatment against Influenza A infections (Zhao et al., 2018,  
71 Vignuzzi and Lopez, 2019, Meir et al., 2020, Tapia et al., 2019, Yang et al., 2019,  
72 Harding et al., 2019, Tanner et al., 2016, Huo et al., 2020b), but also for pan-specific  
73 treatment of other respiratory viral diseases (Dimmock and Easton, 2014, Dimmock  
74 and Easton, 2015). IAV DIPs typically carry a large internal deletion in their genome,  
75 rendering them defective in virus replication (Alnaji and Brooke, 2020, Ziegler and  
76 Botten, 2020, Andreu-Moreno and Sanjuan, 2020). Furthermore, DIPs suppress and  
77 interfere specifically with homologous viral replication in a co-infection scenario, a  
78 process known as replication interference. As a result, administration of IAV DIPs to  
79 mice resulted in full protection against an otherwise lethal IAV infection (Dimmock et  
80 al., 2008, Huo et al., 2020b, Hein et al., 2021)(Hein et al., submitted). In the ferret  
81 model, treatment of IAV-infected animals resulted in a reduced severity of disease  
82 pathogenesis (Dimmock et al., 2012). Intriguingly, mice were also protected against  
83 a lethal infection with the unrelated influenza B virus (Scott et al., 2011) and  
84 pneumonia virus of mice (PVM) from the family *Paramyxoviridae* (Easton et al.,  
85 2011). Here, protection was not attributed to replication interference but to the  
86 ability of IAV DIPs to stimulate innate immunity.

87 SARS-CoV-2 replication seems to modulate and inhibit the interferon (IFN) response  
88 in infected target cells (Chen et al., 2020a, Konno et al., 2020, Lei et al., 2020). Still,  
89 it was also shown to be susceptible to inhibition by exogenously added IFNs *in vitro*  
90 (Busnadiego et al., 2020, Felgenhauer et al., 2020), *in vivo* (Hoagland et al., 2021)  
91 and in clinical trials (Monk et al., 2020). Therapies using recombinant IFNs, however,  
92 are cost intensive and pose the risk of unwanted side effects including the formation

93 of auto-antibodies against the cytokine (reviewed in (Sleijfer et al., 2005)). To  
94 prevent this, we wondered whether IAV DIPs would be able to suppress SARS-CoV-2  
95 replication through their ability to stimulate a physiological IFN response in target  
96 cells. To test this, we produced two promising candidate DIPs: a prototypic, well-  
97 characterized conventional IAV DIP "DI244" (Dimmock and Easton, 2014), and a  
98 novel type of IAV DIP "OP7", that contains point mutations instead of a large internal  
99 deletion in the genome (Kupke et al., 2019) using a cell culture-based production  
100 process (Hein et al., 2021)(Hein et al., submitted).

101 Here, we used Calu-3 cells (human lung cancer cell line) for *in vitro* co-infection  
102 experiments with SARS-CoV-2 and DI244 or OP7, respectively. Both DIPs were able  
103 to completely inhibit SARS-CoV-2 replication and spreading in a range comparable to  
104 IFN- $\beta$  or remdesivir treatment. Moreover, we show that the inhibitory effect of IAV  
105 DIPs was due to their ability to induce innate immune responses that signal via janus  
106 kinase/signal transducers and activators of transcription (JAK/STAT). Yet, additional  
107 mechanisms may also play a role. Thus, we propose IAV DIPs as effective antiviral  
108 agents for the treatment of COVID-19 and, potentially as universal antiviral agents  
109 not only against different influenza subtypes but also against other (including newly  
110 emerging) IFN-sensitive respiratory viruses.

## 111 **Results**

### 112 **SARS-CoV-2 replication is abrogated by IAV DIP treatment *in vitro***

113 In order to test the antiviral efficacy of IAV DIPs on replication of SARS-CoV-2, we  
114 conducted *in vitro* co-infection experiments in Calu-3 cells. For this, we infected cells  
115 with SARS-CoV-2 (multiplicity of infection (MOI) = 0.03) and highly concentrated IAV  
116 DIPs (DI244 or OP7), respectively, from cell culture-based production and  
117 chromatographic purification (Marichal-Gallardo et al., 2017, Hein et al., 2021)(Hein  
118 et al., submitted). At 3 days post infection (dpi), cells were stained for the SARS-  
119 CoV-2 spike (S) protein (Fig. 1A). Indeed, S protein expression was significantly  
120 reduced in cells co-treated with DI244 or OP7 compared to cells infected with SARS-  
121 CoV-2 only, indicating efficient suppression of SARS-CoV-2 replication by IAV DIP co-  
122 infection. In agreement with this observation, images from live-cell microscopy show  
123 a significant amelioration of the cytopathic effect upon DIP co-infection (Fig. 1B).

124 Next, different concentrations of IAV DIPs were tested for the treatment of SARS-  
125 CoV-2-infected cells (Fig. 1C). As a read-out for SARS-CoV-2 replication, we  
126 determined the plaque titer from supernatants at 3 dpi using adherent Vero-6 cells.  
127 Please note that infection with only defective, replication-incompetent IAV DIPs does  
128 not result in the release progeny virions, as demonstrated by negative plaque titers  
129 (Hein et al., 2021)(Hein et al., submitted). Strikingly, SARS-CoV-2 replication was  
130 severely diminished upon IAV DIP co-infection. In particular, at high DI244 and OP7  
131 concentrations, no SARS-CoV-2 plaque titers were detectable anymore, while  
132 untreated cells showed a titer of  $7.5 \times 10^4$  plaque-forming units (PFU)/mL.  
133 Suppression of SARS-CoV-2 replication decreased with increasing dilution of DIPs.

134 Remarkably, though, the treatment with both DIPs at a dilution of 1:1000 still  
135 resulted in a pronounced inhibition of SARS-CoV-2 replication, corresponding to a 26-  
136 fold and 210-fold reduction in plaque titers for DI244 and OP7 treatment,  
137 respectively. For comparison, we also tested the inhibitory capacity of IFN- $\beta$  or  
138 remdesivir treatment on SARS-CoV-2 replication in infected target cells. Both agents  
139 were also able to diminish SARS-CoV-2 plaque titers to below the LOD, until a  
140 concentration of 633 U/mL for IFN- $\beta$  and 0.32  $\mu$ M for remdesivir. Yet, inhibiting  
141 effects ceased significantly faster with increasing dilutions, most apparently observed  
142 for remdesivir, for which treatment with a concentration of 0.03  $\mu$ M already did not  
143 result an inhibitory effect anymore.

144 Fig. 1D illustrates SARS-CoV-2 inhibition caused by inactivated DIPs. These DIPs  
145 were previously UV irradiated until no interfering efficacy against IAV replication was  
146 observed anymore *in vitro* (Hein et al., 2021)(Hein et al., submitted). This suggests  
147 the complete inactivation of the causative interfering agent, i.e., the defective  
148 interfering (DI) viral RNA (vRNA). Nevertheless, inhibition of SARS-CoV-2 replication  
149 by inactivated DIPs was still detectable (Fig. 1D). More specifically, we still observed  
150 a residual suppression of plaque titers. This may be explained by an unspecific  
151 stimulation of the innate immunity by inactivated virus particles, which still have the  
152 capacity to enter target cells and to switch on antiviral processes that ultimately  
153 suppress SARS-CoV-2 replication. However, the finding that the inhibition caused by  
154 active DIPs was more efficient clearly suggests a specific activity of IAV DIPs, leading  
155 to interference with SARS-CoV-2 replication and spreading. Of note, active DIPs still  
156 conferred a pronounced antiviral effect even when applied 24 h after preceding  
157 SARS-CoV-2 infection (Fig. 1E).

158 In conclusion, treatment with both DI244 and OP7 IAV DIPs completely abolished  
159 SARS-CoV-2 replication during *in vitro* co-infections. While the inhibitory potential  
160 was comparable to IFN- $\beta$  and remdesivir treatment, the antiviral effects of IAV DIPs  
161 were more sustained with increasing dilution.



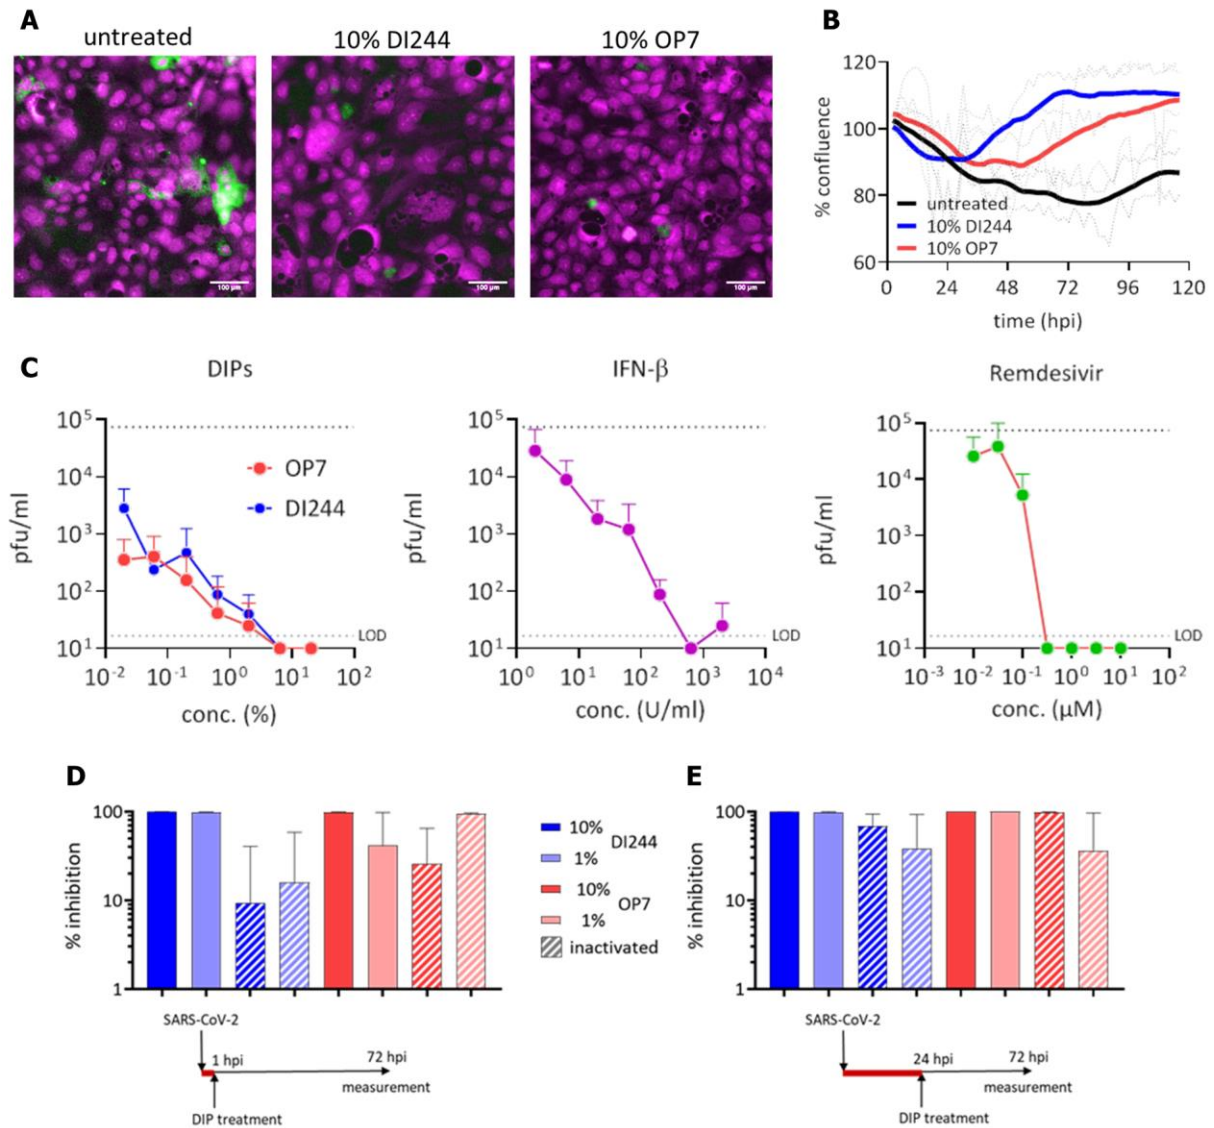

162

163 **Fig. 1. Inhibition of SARS-CoV-2 replication and spreading by IAV DIPs.** SARS-CoV-2-infected  
 164 Calu-3 cells (MOI=0.03) were treated with IAV DIPs (DI244 or OP7), IFN- $\beta$ , or remdesivir at 1 hour  
 165 post infection (hpi). For DI244 and OP7 treatment, highly concentrated produced, cell culture-derived  
 166 DIP material (Hein et al., 2021)(Hein et al., submitted) was used. % (v/v) indicates the fraction with  
 167 respect to the cell culture volume of 100  $\mu$ L. Stock concentration,  $5.6 \times 10^8$  and  $1.12 \times 10^{11}$  DI  
 168 vRNAs/mL for DI244 and OP7, respectively. **(A)** Immunofluorescence analysis of the SARS-CoV-2 S  
 169 protein expression (green, magenta: DNA) at 3 dpi. Scale bar, 100  $\mu$ m. **(B)** Cytopathic effect.  
 170 Confluence (% of initial) was measured by live-cell microscopy at 2 h intervals. Thick lines represent  
 171 smoothed data (Savitzky-Golay filter), dotted lines show SD of original data (n=2, independent  
 172 experiments). **(C)** Effective concentration range of DI244 and OP7 compared to IFN- $\beta$  and remdesivir.  
 173 Viral titers were determined from the supernatant at 3 dpi by plaque assay. Upper dotted line  
 174 indicates virus titer in untreated cells, lower dotted line shows the limit of detection (LOD).  
 175 Independent experiments were conducted; mean +/- SD (n=3) is shown. **(D)** and **(E)** SARS-CoV-2  
 176 growth inhibition by inactivated DIPs. SARS-CoV-2 infected cells were treated with active or UV-

177 inactivated DIPs at 1 hpi (**D**) or 24 hpi (**E**). Percentage inhibition of viral growth relative to mock  
178 treatment is shown; mean +/- SEM (n=3) is depicted.

179 **Inhibition of SARS-CoV-2 replication by IAV DIPs caused by stimulation of**  
180 **innate immunity**

181 Next, to investigate our hypothesis whether inhibition of SARS-CoV-2 replication by  
182 DIPs was due to their ability to stimulate the IFN system, we used ruxolitinib in co-  
183 infection experiments. This small molecule drug is an efficient inhibitor of JAK, which  
184 are key effectors in the IFN system. Upon IFN sensing, JAKs typically recruit STATs,  
185 ultimately leading to the upregulation of IFN-stimulated gene (ISGs). ISGs encode for  
186 effector molecules that limit viral replication by inducing an antiviral state in the  
187 infected as well as uninfected neighboring cells. Fig. 2 shows the results of SARS-  
188 CoV-2 and IAV DIP co-infection upon treatment with ruxolitinib. While DI244 and  
189 OP7 co-infection almost completely inhibited SARS-CoV-2 replication, additional  
190 treatment with ruxolitinib abrogated the suppressive effect of both IAV DIPs.  
191 Specifically, virus titers under JAK signaling inhibition were comparable to SARS-CoV-  
192 2 infection in the absence of DIPs. In conclusion, these results suggest a major  
193 contribution of unspecific innate immune activation by IAV DIPs in interfering with  
194 SARS-CoV-2 replication.

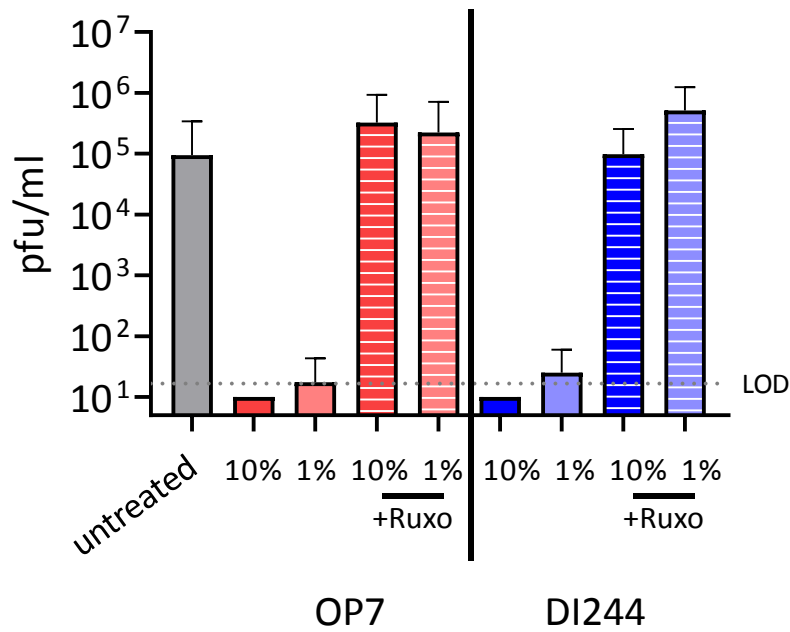

195

196 **Fig. 2. Suppression of SARS-CoV-2 replication by IAV DIPs under JAK inhibition.** SARS-CoV-  
197 2-infected Calu-3 cells (MOI=0.03) were treated with IAV DIPs (DI244 or OP7) at 1 hpi in the  
198 presence of absence of ruxolitinib (JAK inhibitor). % (v/v) indicates the fraction of DIPs (highly  
199 concentrated produced, cell culture-derived material (Hein et al., 2021)(Hein et al., submitted)) with  
200 respect to the cell culture volume of 100  $\mu$ L. Stock concentration,  $5.6 \times 10^8$  and  $1.12 \times 10^{11}$  DI  
201 vRNAs/mL for DI244 and OP7, respectively. Viral titers were determined from the supernatant at 3 dpi  
202 by plaque assay. Dotted line shows the LOD. Independent experiments were conducted; mean +/-SD  
203 (n=3) is depicted.

## 204 **Discussion**

205 Despite the recent availability of vaccines against COVID-19, options for antiviral  
206 treatment are urgently needed for therapeutic application. Here, we show that  
207 produced, cell culture-derived IAV DIPs are highly potent inhibitors of SARS-CoV-2  
208 replication in human lung cells. In addition, our data obtained in *in vitro* experiments  
209 suggest that suppression of SARS-CoV-2 replication by IAV DIPs is predominantly  
210 attributed to their ability to stimulate innate immune responses ultimately inducing  
211 an antiviral state in target cells.

212 In the clinic, already approved antivirals for treatment of COVID-19 showed only very  
213 limited efficacy. For instance, treatment with the polymerase inhibitor remdesivir did  
214 not result in an overall decrease in mortality (Beigel et al., 2020, Pan et al., 2020).  
215 For patients receiving supplemental oxygen, however, an improvement in the  
216 survival rate from about 4% to 12% was observed (Beigel et al., 2020). In addition,  
217 the time required to recover from COVID-19 was decreased by five days (Wang et  
218 al., 2020, Beigel et al., 2020). Another option to treat COVID-19 is the use of  
219 monoclonal antibodies that target the receptor binding domain of the SARS-CoV-2 S  
220 protein, thereby inhibiting engagement with the host cell entry receptor angiotensin-  
221 converting enzyme 2 (ACE2) (Hoffmann et al., 2020, Abraham, 2020). Here, it was  
222 suggested to use antibody cocktails to prevent the emergence of viral escape  
223 variants in treated individuals (Baum et al., 2020). In clinical trials, treatment of  
224 outpatients with one such an antibody cocktail (i.e., bamlanivimab) accelerated the  
225 decrease in viral load and reduced the fraction of patients requiring hospitalization  
226 from 6.3% to 1.6% (Chen et al., 2020b). The administration of the corticosteroid  
227 dexamethasone (in clinical use) resulted in an overall lower mortality in critically ill

228 COVID-19 patients (Horby et al., 2020, Sterne et al., 2020). This has a caveat,  
229 though, as a decrease in mortality was observed for patients requiring oxygen  
230 (including mechanical ventilation), but an increase in mortality was reported for  
231 patients not requiring oxygen (Horby et al., 2020).

232 Treatment of COVID-19 patients with IFNs has not been approved yet. In general,  
233 SARS-CoV-2 infection modulates and inhibits the IFN response (Chen et al., 2020a,  
234 Konno et al., 2020, Lei et al., 2020). Moreover, it was recently shown that the host  
235 cell entry receptor ACE2 is indeed an ISG, and it was speculated that SARS-CoV-2  
236 may exploit the IFN-driven upregulation of ACE2 to enhance infection (Ziegler et al.,  
237 2020). However, SARS-CoV-2 replication was also shown to be susceptible to  
238 inhibition by exogenously added IFN. For instance, all IFNs (type I, II and III)  
239 exhibited potent antiviral activity with SARS-CoV-2 replication *in vitro* (Busnadiego et  
240 al., 2020, Felgenhauer et al., 2020), suggesting that the antiviral activities of IFNs  
241 may counterbalance any proviral effects derived from ACE2 induction. In agreement  
242 with this, intranasal IFN-I administration (in hamsters) pre- or post-virus challenge  
243 was shown to reduce SARS-CoV-2 disease burden (Hoagland et al., 2021). Moreover,  
244 in a placebo-controlled phase 2 clinical trial, administration of inhaled, nebulized IFN  
245 beta-1a resulted in a higher chance of disease improvement and a more rapid  
246 recovery from COVID-19 (Monk et al., 2020).

247 In our cell culture experiments, IAV DIPs completely abrogated SARS-CoV-2  
248 replication. Notably, the UV-irradiated and thus inactive DIP material also showed a  
249 residual inhibitory effect. Yet, the observation of a much stronger antiviral effect  
250 upon treatment with active DIPs hints to a specific activity of IAV DIPs in the context  
251 of SARS-CoV-2 suppression. DIPs are defective in virus replication, and thus they fail

252 to complete the entire infection cycle. However, the incoming genomic vRNAs,  
253 packaged into a viral ribonucleoprotein (vRNP) complex (Eisfeld et al., 2015), still  
254 show polymerase activity and transcribe viral mRNAs (Vreede et al., 2004, Heldt et  
255 al., 2012, Vreede and Brownlee, 2007). In particular, the short DI vRNAs (and likely,  
256 also the resulting short DI mRNAs) were shown to be preferentially bound by the  
257 retinoic acid inducible gene I (RIG-I) protein (Baum and Garcia-Sastre, 2011), which  
258 subsequently leads to the activation of an IFN-response (Rehwinkel et al., 2010).

259 Our results support the notion that IAV DIPs do not only protect host cells from IAV  
260 infection but, in addition, may generally confer protection against other heterologous  
261 IFN-sensitive respiratory viruses (Easton et al., 2011, Scott et al., 2011, Dimmock  
262 and Easton, 2015). Considering the emergence of new SARS-CoV-2 variants that  
263 render the efficacy of various vaccine candidates questionable, the unspecific  
264 stimulation of innate immunity by IAV DIPs may be advantageous; in particular,  
265 regarding a potential universal efficacy against such new (and future) variants.  
266 Furthermore, *in vitro* and *in vivo* experiments revealed an antiviral effect of IAV DIPs  
267 (derived from strains originally isolated in 1933 and 1934) against a variety of  
268 different IAV subtypes that have been isolated between 1933-2014, including  
269 pandemic and highly pathogenic avian IAV strains (Dimmock et al., 2008, Dimmock  
270 et al., 2012, Zhao et al., 2018, Huo et al., 2020a).

271 Future work to investigate the feasibility to use IAV DIPs against SARS-CoV-2  
272 infection will comprise animal trials in Syrian hamsters, which are (in contrast to  
273 mice) highly permissive to SARS-CoV-2 and develop a similar lung disease compared  
274 to human COVID-19 (Kaptein et al., 2020, Boudewijns et al., 2020, Chan et al.,  
275 2020). As an alternative approach, SARS-CoV-2/IAV DIP co-infection studies to clarify

276 the therapeutic effects of IAV DIPs on the outcome of SARS-CoV-2 infection and to  
277 decipher in more detail the underlying mode of action may be performed in  
278 humanized K18-hACE2 mice. These mice are genetically modified to express the  
279 human ACE2 receptor rendering them susceptible for SARS-CoV-2 infection and have  
280 recently been shown to develop respiratory disease resembling severe COVID-19 in  
281 humans (Yinda et al., 2021). Animal experiments will help to elaborate on the  
282 potential applicability of IAV DIPs as a pre- and post-exposure treatment for instance  
283 in acute SARS-CoV-2 outbreak scenarios in the clinics or geriatric institutions. In  
284 addition to vaccination, this would represent an interesting option for prophylactic  
285 treatment to boost antiviral immunity in persons at acute risk for an infection or for  
286 therapeutic treatment during an early phase post infection and as such may prevent  
287 fatal COVID-19 outcomes.



## 288 **Materials and methods**

### 289 **Cells and viruses**

290 Vero-6 cells (ATCC CRL-1586) were maintained in DMEM medium (Gibco, 4.5 g/L  
291 glucose, w/o pyruvate) supplemented with 10% fetal calf serum (FCS, Biowest,  
292 S1810-6500), 100 IU/mL penicillin, 100 µg/mL streptomycin, 1x GlutaMax (Gibco)  
293 and 1x sodium pyruvate (Gibco). Calu-3 cells (ATCC HTB-55) were cultured in MEM  
294 (Sigma) supplemented with 10% FCS (Biowest, S1810-6500), 100 IU/mL penicillin,  
295 100 µg/mL streptomycin, 1x GlutaMax (Gibco) and 1x sodium pyruvate (Gibco).  
296 Caco-2 cells (ATCC HTB-37) were grown in MEM (Gibco) supplemented with 20 %  
297 FCS (Biowest, S1810-6500), 100 IU/mL penicillin, 100 µg/mL streptomycin, 1x  
298 GlutaMax (Gibco) and 1x non-essential amino acid solution (Gibco). All cells were  
299 maintained or infected at 37°C in a 5% CO<sub>2</sub> atmosphere.

300 The IAV DIPs DI244 and OP7 were produced in a cell culture-based process using a  
301 500 mL laboratory scale stirred tank bioreactor, followed by purification and  
302 concentration by membrane-based steric exclusion chromatography (Marichal-  
303 Gallardo et al., 2017), as described previously (Hein et al., 2021)(Hein et al.,  
304 submitted). Production titers of 3.3 and 3.67 log hemagglutination (HA) units/100µL  
305 (quantified by the HA assay (Kalbfuss et al., 2008)) and  $5.6 \times 10^8$  and  $1.12 \times 10^{11}$  DI  
306 vRNAs/mL (quantified by real-time RT-qPCR (Kupke et al., 2019, Hein et al., 2021,  
307 Wasik et al., 2018)) were achieved for DI244 and OP7, respectively.

308 The SARS-CoV-2 isolate hCoV-19/Croatia/ZG-297-20/2020 was used. All experiments  
309 with infectious SARS-CoV-2 were performed in the BSL-3 facility at the Helmholtz  
310 Centre for Infection Research (Braunschweig, Germany). The SARS-CoV-2 seed virus

311 was produced in Caco-2 cells, and virus particles were enriched in Vivaspin 20  
312 columns (Sartorius Stedim, Biotech) via centrifugation. Collected virus was stored at -  
313 80°C. SARS-CoV-2 titers were quantified by plaque assay.

314

### 315 **Plaque assay**

316 Quantification of SARS-CoV-2 was performed by plaque assay. Samples were serially  
317 diluted in 10-fold steps, and used to infect a confluent monolayer of Vero-6 cells (on  
318 96-well plates) for 1 h. Then, the inoculum was removed and cells were overlaid with  
319 cell culture medium containing 1.5% methyl-cellulose (SIGMA, #C9481-500). At 3  
320 dpi, cells were fixed with 6% formaldehyde and stained with crystal violet. Wells  
321 were imaged using a Sartorius IncuCyte S3 (4x objective, whole-well scan) and  
322 plaque counts were determined.

323

### 324 **SARS-CoV-2 infection and antiviral treatment**

325 Confluent Calu-3 cells in 96-well plates ( $\sim 6 \times 10^4$  cells/well) were infected with SARS-  
326 CoV-2 (2000 PFU per well). At 1 or 24 hpi, we added active or inactive IAV DIPs  
327 (DI244 or OP7) at indicated fractions (% v/v) with respect to the cell culture volume  
328 of 100  $\mu$ L. Whenever indicated, we additionally added 0.8  $\mu$ M ruxolitinib (Cayman  
329 Chemical, Cat. #Cay11609-1) to these wells. Alternatively, remdesivir (MedChem  
330 Express, #HY-104077) or human IFN- $\beta$ -1A (PBL assay science, #11415-1) (instead  
331 of IAV DIPs) were added at indicated concentrations at 1 hpi. Supernatants were

332 collected at 3 dpi. Quantification of SARS-CoV-2 titers was performed using the  
333 plaque assay.

334

### 335 **Immunofluorescence staining**

336 SARS-CoV-2 infected cells were fixed with 6% paraformaldehyde in PBS for 1 h at  
337 room temperature, followed by washing with PBS. Cells were permeabilized with  
338 0.1% Triton X-100 in PBS for 10 min at room temperature, washed with PBS, and  
339 blocked with 2% BSA in PBS for 1 h. Antibody labelling was performed with mouse  
340 anti-SARS-CoV-2 S protein (Abcalis, clone AB68-A09, #ABK68-A09-M) and secondary  
341 antibody anti-mouse Alexa488 (Cell Signaling Technology, #4408), each step  
342 followed by three washing steps with PBS containing 0.05% Tween-20. Finally, cells  
343 were overlaid with Vectashield mounting medium (Biozol, #VEC-H-1000).

344 **Acknowledgement**

345 This research was supported by a grant from the German Federal Ministry of Science  
346 and Education (Grant No. 01KI20140A).

347

348 **Declaration of interests**

349 A patent for the use of OP7 as an antiviral agent for treatment of IAV infection is  
350 pending. Patent holders are S.Y.K. and U.R. (Udo Reichl).

351 Another patent for the use of DI244 and OP7 as an antiviral agent for treatment of  
352 coronavirus infection is pending. Patent holders are S.Y.K., U.R. (Udo Reichl), M.H.,  
353 U.R. (Ulfert Rand) and D.B.

354 P.M.G. and U.R. (Udo Reichl) are inventors in a pending patent application detailing  
355 the technology used for the chromatographic purification of the influenza virus  
356 particles used in this study.

## 357 **References**

- 358 ABRAHAM, J. 2020. Passive antibody therapy in COVID-19. *Nat Rev Immunol*, 20, 401-403.
- 359 ALNAJI, F. G. & BROOKE, C. B. 2020. Influenza virus DI particles: Defective interfering or delightfully  
360 interesting? *PLoS Pathog*, 16, e1008436.
- 361 ANDREU-MORENO, I. & SANJUAN, R. 2020. Collective Viral Spread Mediated by Virion Aggregates  
362 Promotes the Evolution of Defective Interfering Particles. *Mbio*, 11.
- 363 BAUM, A., FULTON, B. O., WLOGA, E., COPIN, R., PASCAL, K. E., RUSSO, V., GIORDANO, S., LANZA, K.,  
364 NEGRON, N., NI, M., WEI, Y., ATWAL, G. S., MURPHY, A. J., STAHL, N., YANCOPOULOS, G. D. &  
365 KYRATSOUS, C. A. 2020. Antibody cocktail to SARS-CoV-2 spike protein prevents rapid  
366 mutational escape seen with individual antibodies. *Science*, 369, 1014-1018.
- 367 BAUM, A. & GARCIA-SASTRE, A. 2011. Differential recognition of viral RNA by RIG-I. *Virulence*, 2, 166-  
368 9.
- 369 BEIGEL, J. H., TOMASHEK, K. M., DODD, L. E., MEHTA, A. K., ZINGMAN, B. S., KALIL, A. C., HOHMANN,  
370 E., CHU, H. Y., LUETKEMEYER, A., KLINE, S., LOPEZ DE CASTILLA, D., FINBERG, R. W.,  
371 DIERBERG, K., TAPSON, V., HSIEH, L., PATTERSON, T. F., PAREDES, R., SWEENEY, D. A., SHORT,  
372 W. R., TOULOUMI, G., LYE, D. C., OHMAGARI, N., OH, M. D., RUIZ-PALACIOS, G. M., BENFIELD,  
373 T., FATKENHEUER, G., KORTEPETER, M. G., ATMAR, R. L., CREECH, C. B., LUNDGREN, J.,  
374 BABIKER, A. G., PETT, S., NEATON, J. D., BURGESS, T. H., BONNETT, T., GREEN, M.,  
375 MAKOWSKI, M., OSINUSI, A., NAYAK, S., LANE, H. C. & MEMBERS, A.-S. G. 2020. Remdesivir  
376 for the Treatment of Covid-19 - Final Report. *N Engl J Med*, 383, 1813-1826.
- 377 BOUDEWIJNS, R., THIBAUT, H. J., KAPTEIN, S. J. F., LI, R., VERGOTE, V., SELDESLACHTS, L., VAN  
378 WEYENBERGH, J., DE KEYSER, C., BERVOETS, L., SHARMA, S., LIESENBORGH, L., MA, J.,  
379 JANSEN, S., VAN LOOVEREN, D., VERCRUYSE, T., WANG, X., JOCHMANS, D., MARTENS, E.,  
380 ROOSE, K., DE VLIET, D., SCHEPENS, B., VAN BUYTEN, T., JACOBS, S., LIU, Y., MARTI-  
381 CARRERAS, J., VANMECHELEN, B., WAWINA-BOKALANGA, T., DELANG, L., ROCHA-PEREIRA, J.,  
382 COELMONT, L., CHIU, W., LEYSSEN, P., HEYLEN, E., SCHOLS, D., WANG, L., CLOSE, L.,  
383 MATTHIJNSSENS, J., VAN RANST, M., COMPERNOLLE, V., SCHRAMM, G., VAN LAERE, K.,  
384 SAELENS, X., CALLEWAERT, N., OPDENAKKER, G., MAES, P., WEYNAND, B., CAWTHORNE, C.,  
385 VANDE VELDE, G., WANG, Z., NEYTS, J. & DALLMEIER, K. 2020. STAT2 signaling restricts viral  
386 dissemination but drives severe pneumonia in SARS-CoV-2 infected hamsters. *Nat Commun*,  
387 11, 5838.
- 388 BOULWARE, D. R., PULLEN, M. F., BANGDIWALA, A. S., PASTICK, K. A., LOFGREN, S. M., OKAFOR, E. C.,  
389 SKIPPER, C. P., NASCENE, A. A., NICOL, M. R., ABASSI, M., ENGEN, N. W., CHENG, M. P.,  
390 LABAR, D., LOTHER, S. A., MACKENZIE, L. J., DROBOT, G., MARTEN, N., ZARYCHANSKI, R.,  
391 KELLY, L. E., SCHWARTZ, I. S., MCDONALD, E. G., RAJASINGHAM, R., LEE, T. C. & HULLSIEK, K.  
392 H. 2020. A Randomized Trial of Hydroxychloroquine as Postexposure Prophylaxis for Covid-  
393 19. *N Engl J Med*, 383, 517-525.
- 394 BUSNADIEGO, I., FERNBACH, S., POHL, M. O., KARAKUS, U., HUBER, M., TRKOLA, A., STERTZ, S. &  
395 HALE, B. G. 2020. Antiviral Activity of Type I, II, and III Interferons Counterbalances ACE2  
396 Inducibility and Restricts SARS-CoV-2. *mBio*, 11.
- 397 CAO, B., WANG, Y., WEN, D., LIU, W., WANG, J., FAN, G., RUAN, L., SONG, B., CAI, Y., WEI, M., LI, X.,  
398 XIA, J., CHEN, N., XIANG, J., YU, T., BAI, T., XIE, X., ZHANG, L., LI, C., YUAN, Y., CHEN, H., LI, H.,  
399 HUANG, H., TU, S., GONG, F., LIU, Y., WEI, Y., DONG, C., ZHOU, F., GU, X., XU, J., LIU, Z.,  
400 ZHANG, Y., LI, H., SHANG, L., WANG, K., LI, K., ZHOU, X., DONG, X., QU, Z., LU, S., HU, X.,  
401 RUAN, S., LUO, S., WU, J., PENG, L., CHENG, F., PAN, L., ZOU, J., JIA, C., WANG, J., LIU, X.,  
402 WANG, S., WU, X., GE, Q., HE, J., ZHAN, H., QIU, F., GUO, L., HUANG, C., JAKI, T., HAYDEN, F.  
403 G., HORBY, P. W., ZHANG, D. & WANG, C. 2020. A Trial of Lopinavir-Ritonavir in Adults  
404 Hospitalized with Severe Covid-19. *N Engl J Med*, 382, 1787-1799.
- 405 CHAN, J. F., ZHANG, A. J., YUAN, S., POON, V. K., CHAN, C. C., LEE, A. C., CHAN, W. M., FAN, Z., TSOI,  
406 H. W., WEN, L., LIANG, R., CAO, J., CHEN, Y., TANG, K., LUO, C., CAI, J. P., KOK, K. H., CHU, H.,

- 407 CHAN, K. H., SRIDHAR, S., CHEN, Z., CHEN, H., TO, K. K. & YUEN, K. Y. 2020. Simulation of the  
408 Clinical and Pathological Manifestations of Coronavirus Disease 2019 (COVID-19) in a Golden  
409 Syrian Hamster Model: Implications for Disease Pathogenesis and Transmissibility. *Clin Infect*  
410 *Dis*, 71, 2428-2446.
- 411 CHEN, D. Y., KHAN, N., CLOSE, B. J., GOEL, R. K., BLUM, B., TAVARES, A. H., KENNEY, D., CONWAY, H.  
412 L., EWOLDT, J. K., KAPELL, S., CHITALIA, V. C., CROSSLAND, N. A., CHEN, C. S., KOTTON, D. N.,  
413 BAKER, S. C., CONNOR, J. H., DOUAM, F., EMILI, A. & SAEED, M. 2020a. SARS-CoV-2  
414 desensitizes host cells to interferon through inhibition of the JAK-STAT pathway. *bioRxiv*.
- 415 CHEN, P., NIRULA, A., HELLER, B., GOTTLIEB, R. L., BOSCIA, J., MORRIS, J., HUHN, G., CARDONA, J.,  
416 MOCHERLA, B., STOSOR, V., SHAWA, I., ADAMS, A. C., VAN NAARDEN, J., CUSTER, K. L., SHEN,  
417 L., DURANTE, M., OAKLEY, G., SCHADE, A. E., SABO, J., PATEL, D. R., KLEKOTKA, P.,  
418 SKOVRONSKY, D. M. & INVESTIGATORS, B.-. 2020b. SARS-CoV-2 Neutralizing Antibody LY-  
419 CoV555 in Outpatients with Covid-19. *N Engl J Med*.
- 420 DIMMOCK, N. J., DOVE, B. K., SCOTT, P. D., MENG, B., TAYLOR, I., CHEUNG, L., HALLIS, B., MARRIOTT,  
421 A. C., CARROLL, M. W. & EASTON, A. J. 2012. Cloned defective interfering influenza virus  
422 protects ferrets from pandemic 2009 influenza A virus and allows protective immunity to be  
423 established. *PLoS One*, 7, e49394.
- 424 DIMMOCK, N. J. & EASTON, A. J. 2014. Defective interfering influenza virus RNAs: time to reevaluate  
425 their clinical potential as broad-spectrum antivirals? *J Virol*, 88, 5217-27.
- 426 DIMMOCK, N. J. & EASTON, A. J. 2015. Cloned Defective Interfering Influenza RNA and a Possible Pan-  
427 Specific Treatment of Respiratory Virus Diseases. *Viruses*, 7, 3768-88.
- 428 DIMMOCK, N. J., RAINSFORD, E. W., SCOTT, P. D. & MARRIOTT, A. C. 2008. Influenza virus protecting  
429 RNA: an effective prophylactic and therapeutic antiviral. *J Virol*, 82, 8570-8.
- 430 EASTON, A. J., SCOTT, P. D., EDWORTHY, N. L., MENG, B., MARRIOTT, A. C. & DIMMOCK, N. J. 2011. A  
431 novel broad-spectrum treatment for respiratory virus infections: influenza-based defective  
432 interfering virus provides protection against pneumovirus infection in vivo. *Vaccine*, 29,  
433 2777-84.
- 434 EISFELD, A. J., NEUMANN, G. & KAWAOKA, Y. 2015. At the centre: influenza A virus  
435 ribonucleoproteins. *Nat Rev Microbiol*, 13, 28-41.
- 436 FELGENHAUER, U., SCHOEN, A., GAD, H. H., HARTMANN, R., SCHAUBMAR, A. R., FAILING, K.,  
437 DROSTEN, C. & WEBER, F. 2020. Inhibition of SARS-CoV-2 by type I and type III interferons. *J*  
438 *Biol Chem*, 295, 13958-13964.
- 439 HARDING, A. T., HAAS, G. D., CHAMBERS, B. S. & HEATON, N. S. 2019. Influenza viruses that require  
440 10 genomic segments as antiviral therapeutics. *Plos Pathogens*, 15.
- 441 HEIN, M. D., KOLLMUS, H., MARICHAL-GALLARDO, P., PUTTKER, S., BENNDORF, D., GENZEL, Y.,  
442 SCHUGHART, K., KUPKE, S. Y. & REICHL, U. 2021. OP7, a novel influenza A virus defective  
443 interfering particle: production, purification, and animal experiments demonstrating antiviral  
444 potential. *Appl Microbiol Biotechnol*, 105, 129-146.
- 445 HELDT, F. S., FRENSING, T. & REICHL, U. 2012. Modeling the intracellular dynamics of influenza virus  
446 replication to understand the control of viral RNA synthesis. *J Virol*, 86, 7806-17.
- 447 HOAGLAND, D. A., MOLLER, R., UHL, S. A., OISHI, K., FRERE, J., GOLYNKER, I., HORIUCHI, S., PANIS, M.,  
448 BLANCO-MELO, D., SACHS, D., ARKUN, K., LIM, J. K. & TENOEVER, B. R. 2021. Leveraging the  
449 antiviral type I interferon system as a first line of defense against SARS-CoV-2 pathogenicity.  
450 *Immunity*.
- 451 HOFFMANN, M., KLEINE-WEBER, H., SCHROEDER, S., KRUGER, N., HERRLER, T., ERICHSEN, S.,  
452 SCHIERGENS, T. S., HERRLER, G., WU, N. H., NITSCHKE, A., MULLER, M. A., DROSTEN, C. &  
453 POHLMANN, S. 2020. SARS-CoV-2 Cell Entry Depends on ACE2 and TMPRSS2 and Is Blocked  
454 by a Clinically Proven Protease Inhibitor. *Cell*, 181, 271-280 e8.
- 455 HORBY, P., LIM, W. S., EMBERSON, J. R., MAFHAM, M., BELL, J. L., LINSSELL, L., STAPLIN, N.,  
456 BRIGHTLING, C., USTIANOWSKI, A., ELMAHI, E., PRUDON, B., GREEN, C., FELTON, T.,  
457 CHADWICK, D., REGE, K., FEGAN, C., CHAPPELL, L. C., FAUST, S. N., JAKI, T., JEFFERY, K.,  
458 MONTGOMERY, A., ROWAN, K., JUSZCZAK, E., BAILLIE, J. K., HAYNES, R. & LANDRAY, M. J.

- 459 2020. Dexamethasone in Hospitalized Patients with Covid-19 - Preliminary Report. *N Engl J*  
460 *Med*.
- 461 HUO, C., CHENG, J., XIAO, J., CHEN, M., ZOU, S., TIAN, H., WANG, M., SUN, L., HAO, Z. & HU, Y. 2020a.  
462 Defective Viral Particles Produced in Mast Cells Can Effectively Fight Against Lethal Influenza  
463 A Virus. *Front Microbiol*, 11, 553274.
- 464 HUO, C., TIAN, J., CHENG, J., XIAO, J., CHEN, M., ZOU, S., TIAN, H., WANG, M., SUN, H. & HU, Y.  
465 2020b. Safety, Immunogenicity, and Effectiveness of Defective Viral Particles Arising in Mast  
466 Cells Against Influenza in Mice. *Front Immunol*, 11, 585254.
- 467 JACKSON, L. A., ANDERSON, E. J., ROUPHAEL, N. G., ROBERTS, P. C., MAKHENE, M., COLER, R. N.,  
468 MCCULLOUGH, M. P., CHAPPELL, J. D., DENISON, M. R., STEVENS, L. J., PRUIJSSERS, A. J.,  
469 MCDERMOTT, A., FLACH, B., DORIA-ROSE, N. A., CORBETT, K. S., MORABITO, K. M., O'DELL,  
470 S., SCHMIDT, S. D., SWANSON, P. A., 2ND, PADILLA, M., MASCOLA, J. R., NEUZIL, K. M.,  
471 BENNETT, H., SUN, W., PETERS, E., MAKOWSKI, M., ALBERT, J., CROSS, K., BUCHANAN, W.,  
472 PIKAART-TAUTGES, R., LEDGERWOOD, J. E., GRAHAM, B. S., BEIGEL, J. H. & M, R. N. A. S. G.  
473 2020. An mRNA Vaccine against SARS-CoV-2 - Preliminary Report. *N Engl J Med*, 383, 1920-  
474 1931.
- 475 KALBFUSS, B., KNOCHLEIN, A., KROBER, T. & REICHL, U. 2008. Monitoring influenza virus content in  
476 vaccine production: precise assays for the quantitation of hemagglutination and  
477 neuraminidase activity. *Biologicals*, 36, 145-61.
- 478 KAPTEIN, S. J. F., JACOBS, S., LANGENDRIES, L., SELDESLACHTS, L., TER HORST, S., LIESENBORGHS, L.,  
479 HENS, B., VERGOTE, V., HEYLEN, E., BARTHELEMY, K., MAAS, E., DE KEYZER, C., BERVOETS, L.,  
480 RYMENANTS, J., VAN BUYTEN, T., ZHANG, X., ABDELNABI, R., PANG, J., WILLIAMS, R.,  
481 THIBAUT, H. J., DALLMEIER, K., BOUDEWIJNS, R., WOUTERS, J., AUGUSTIJNS, P.,  
482 VEROUGSTRAETE, N., CAWTHORNE, C., BREUER, J., SOLAS, C., WEYNAND, B., ANNAERT, P.,  
483 SPRIET, I., VANDE VELDE, G., NEYTS, J., ROCHA-PEREIRA, J. & DELANG, L. 2020. Favipiravir at  
484 high doses has potent antiviral activity in SARS-CoV-2-infected hamsters, whereas  
485 hydroxychloroquine lacks activity. *Proc Natl Acad Sci U S A*, 117, 26955-26965.
- 486 KONNO, Y., KIMURA, I., URIU, K., FUKUSHI, M., IRIE, T., KOYANAGI, Y., SAUTER, D., GIFFORD, R. J.,  
487 CONSORTIUM, U.-C., NAKAGAWA, S. & SATO, K. 2020. SARS-CoV-2 ORF3b Is a Potent  
488 Interferon Antagonist Whose Activity Is Increased by a Naturally Occurring Elongation  
489 Variant. *Cell Rep*, 32, 108185.
- 490 KRAMMER, F. 2020. SARS-CoV-2 vaccines in development. *Nature*, 586, 516-527.
- 491 KUPKE, S. Y., RIEDEL, D., FRENSING, T., ZMORA, P. & REICHL, U. 2019. A Novel Type of Influenza A  
492 Virus-Derived Defective Interfering Particle with Nucleotide Substitutions in Its Genome. *J*  
493 *Virology*, 93.
- 494 LEI, X., DONG, X., MA, R., WANG, W., XIAO, X., TIAN, Z., WANG, C., WANG, Y., LI, L., REN, L., GUO, F.,  
495 ZHAO, Z., ZHOU, Z., XIANG, Z. & WANG, J. 2020. Activation and evasion of type I interferon  
496 responses by SARS-CoV-2. *Nat Commun*, 11, 3810.
- 497 LOGUNOV, D. Y., DOLZHIKOVA, I. V., ZUBKOVA, O. V., TUKHVATULLIN, A. I., SHCHEBLYAKOV, D. V.,  
498 DZHARULLAEVA, A. S., GROUSOVA, D. M., EROKHOVA, A. S., KOVYRSHINA, A. V., BOTIKOV, A.  
499 G., IZHAeva, F. M., POPOVA, O., OZHAROVSKAYA, T. A., ESMAGAMBETOV, I. B.,  
500 FAVORSKAYA, I. A., ZRELKIN, D. I., VORONINA, D. V., SHCHERBININ, D. N., SEMIKHIN, A. S.,  
501 SIMAKOVA, Y. V., TOKARSKAYA, E. A., LUBENETS, N. L., EGOROVA, D. A., SHMAROV, M. M.,  
502 NIKITENKO, N. A., MOROZOVA, L. F., SMOLYARCHUK, E. A., KRYUKOV, E. V., BABIRA, V. F.,  
503 BORISEVICH, S. V., NARODITSKY, B. S. & GINTSBURG, A. L. 2020. Safety and immunogenicity  
504 of an rAd26 and rAd5 vector-based heterologous prime-boost COVID-19 vaccine in two  
505 formulations: two open, non-randomised phase 1/2 studies from Russia. *Lancet*, 396, 887-  
506 897.
- 507 MARICHAL-GALLARDO, P., PIELER, M. M., WOLFF, M. W. & REICHL, U. 2017. Steric exclusion  
508 chromatography for purification of cell culture-derived influenza A virus using regenerated  
509 cellulose membranes and polyethylene glycol. *J Chromatogr A*, 1483, 110-119.

- 510 MEIR, M., HAREL, N., MILLER, D., GELBART, M., ELДАР, A., GOPHNA, U. & STERN, A. 2020.  
511 Competition between social cheater viruses is driven by mechanistically different cheating  
512 strategies. *Science Advances*, 6.
- 513 MONK, P. D., MARSDEN, R. J., TEAR, V. J., BROOKES, J., BATTEN, T. N., MANKOWSKI, M., GABBAY, F.  
514 J., DAVIES, D. E., HOLGATE, S. T., HO, L. P., CLARK, T., DJUKANOVIC, R., WILKINSON, T. M. A. &  
515 INHALED INTERFERON BETA, C.-S. G. 2020. Safety and efficacy of inhaled nebulised  
516 interferon beta-1a (SNG001) for treatment of SARS-CoV-2 infection: a randomised, double-  
517 blind, placebo-controlled, phase 2 trial. *Lancet Respir Med*.
- 518 PALACIOS, R., PATINO, E. G., DE OLIVEIRA PIORELLI, R., CONDE, M., BATISTA, A. P., ZENG, G., XIN, Q.,  
519 KALLAS, E. G., FLORES, J., OCKENHOUSE, C. F. & GAST, C. 2020. Double-Blind, Randomized,  
520 Placebo-Controlled Phase III Clinical Trial to Evaluate the Efficacy and Safety of treating  
521 Healthcare Professionals with the Adsorbed COVID-19 (Inactivated) Vaccine Manufactured by  
522 Sinovac - PROFISCOV: A structured summary of a study protocol for a randomised controlled  
523 trial. *Trials*, 21, 853.
- 524 PAN, H., PETO, R., HENAO-RESTREPO, A. M., PREZIOSI, M. P., SATHIYAMOORTHY, V., ABDOOL KARIM,  
525 Q., ALEJANDRIA, M. M., HERNANDEZ GARCIA, C., KIENY, M. P., MALEKZADEH, R., MURTHY, S.,  
526 REDDY, K. S., ROSES PERIAGO, M., ABI HANNA, P., ADER, F., AL-BADER, A. M., ALHASAWI, A.,  
527 ALLUM, E., ALOTAIBI, A., ALVAREZ-MORENO, C. A., APPADOO, S., ASIRI, A., AUKRUST, P.,  
528 BARRATT-DUE, A., BELLANI, S., BRANCA, M., CAPPEL-PORTER, H. B. C., CERRATO, N., CHOW,  
529 T. S., COMO, N., EUSTACE, J., GARCIA, P. J., GODBOLE, S., GOTUZZO, E., GRISKEVICIUS, L.,  
530 HAMRA, R., HASSAN, M., HASSANY, M., HUTTON, D., IRMANSYAH, I., JANCORIENTE, L.,  
531 KIRWAN, J., KUMAR, S., LENNON, P., LOPARDO, G., LYDON, P., MAGRINI, N., MAGUIRE, T.,  
532 MANEVSKA, S., MANUEL, O., MCGINTY, S., MEDINA, M. T., MESA RUBIO, M. L., MIRANDA-  
533 MONTOYA, M. C., NEL, J., NUNES, E. P., PEROLA, M., PORTOLES, A., RASMIN, M. R., RAZA, A.,  
534 REES, H., REGES, P. P. S., ROGERS, C. A., SALAMI, K., SALVADORI, M. I., SINANI, N., STERNE, J.  
535 A. C., STEVANOVIKJ, M., TACCONELLI, E., TIKKINEN, K. A. O., TRELLE, S., ZAID, H., ROTTINGEN,  
536 J. A. & SWAMINATHAN, S. 2020. Repurposed Antiviral Drugs for Covid-19 - Interim WHO  
537 Solidarity Trial Results. *N Engl J Med*.
- 538 REHWINKEL, J., TAN, C. P., GOUBAU, D., SCHULZ, O., PICHLMAIR, A., BIER, K., ROBB, N., VREEDE, F.,  
539 BARCLAY, W., FODOR, E. & REIS E SOUSA, C. 2010. RIG-I detects viral genomic RNA during  
540 negative-strand RNA virus infection. *Cell*, 140, 397-408.
- 541 SCOTT, P. D., MENG, B., MARRIOTT, A. C., EASTON, A. J. & DIMMOCK, N. J. 2011. Defective interfering  
542 influenza A virus protects in vivo against disease caused by a heterologous influenza B virus. *J*  
543 *Gen Virol*, 92, 2122-2132.
- 544 SLEIJFER, S., BANNINK, M., VAN GOOL, A. R., KRUIT, W. H. & STOTER, G. 2005. Side effects of  
545 interferon-alpha therapy. *Pharm World Sci*, 27, 423-31.
- 546 STERNE, J. A. C., MURTHY, S., DIAZ, J. V., SLUTSKY, A. S., VILLAR, J., ANGUS, D. C., ANNANE, D.,  
547 AZEVEDO, L. C. P., BERWANGER, O., CAVALCANTI, A. B., DEQUIN, P. F., DU, B., EMBERSON, J.,  
548 FISHER, D., GIRAUDEAU, B., GORDON, A. C., GRANHOLM, A., GREEN, C., HAYNES, R., HEMING,  
549 N., HIGGINS, J. P. T., HORBY, P., JUNI, P., LANDRAY, M. J., LE GOUGE, A., LECLERC, M., LIM, W.  
550 S., MACHADO, F. R., MCARTHUR, C., MEZIANI, F., MOLLER, M. H., PERNER, A., PETERSEN, M.  
551 W., SAVOVIC, J., TOMAZINI, B., VEIGA, V. C., WEBB, S. & MARSHALL, J. C. 2020. Association  
552 Between Administration of Systemic Corticosteroids and Mortality Among Critically Ill  
553 Patients With COVID-19: A Meta-analysis. *JAMA*, 324, 1330-1341.
- 554 TANNER, E. J., KIRKEGAARD, K. A. & WEINBERGER, L. S. 2016. Exploiting Genetic Interference for  
555 Antiviral Therapy. *PLoS Genet*, 12, e1005986.
- 556 TAPIA, F., LASKE, T., WASIK, M. A., RAMMHOLD, M., GENZEL, Y. & REICHL, U. 2019. Production of  
557 Defective Interfering Particles of Influenza A Virus in Parallel Continuous Cultures at Two  
558 Residence Times-Insights From qPCR Measurements and Viral Dynamics Modeling. *Frontiers*  
559 *in Bioengineering and Biotechnology*, 7.
- 560 TOMAZINI, B. M., MAIA, I. S., CAVALCANTI, A. B., BERWANGER, O., ROSA, R. G., VEIGA, V. C.,  
561 AVEZUM, A., LOPES, R. D., BUENO, F. R., SILVA, M., BALDASSARE, F. P., COSTA, E. L. V.,



562 MOURA, R. A. B., HONORATO, M. O., COSTA, A. N., DAMIANI, L. P., LISBOA, T., KAWANO-  
563 DOURADO, L., ZAMPIERI, F. G., OLIVATO, G. B., RIGHY, C., AMENDOLA, C. P., ROEPKE, R. M.  
564 L., FREITAS, D. H. M., FORTE, D. N., FREITAS, F. G. R., FERNANDES, C. C. F., MELRO, L. M. G.,  
565 JUNIOR, G. F. S., MORAIS, D. C., ZUNG, S., MACHADO, F. R., AZEVEDO, L. C. P. &  
566 INVESTIGATORS, C. C.-B. I. 2020. Effect of Dexamethasone on Days Alive and Ventilator-Free  
567 in Patients With Moderate or Severe Acute Respiratory Distress Syndrome and COVID-19:  
568 The CoDEX Randomized Clinical Trial. *JAMA*, 324, 1307-1316.

569 VIGNUZZI, M. & LOPEZ, C. B. 2019. Defective viral genomes are key drivers of the virus-host  
570 interaction. *Nat Microbiol*, 4, 1075-1087.

571 VOYSEY, M., CLEMENS, S. A. C., MADHI, S. A., WECKX, L. Y., FOLEGATTI, P. M., ALEY, P. K., ANGUS, B.,  
572 BAILLIE, V. L., BARNABAS, S. L., BHORAT, Q. E., BIBI, S., BRINER, C., CICCIONI, P., COLLINS, A.  
573 M., COLIN-JONES, R., CUTLAND, C. L., DARTON, T. C., DHEDA, K., DUNCAN, C. J. A., EMARY, K.  
574 R. W., EWER, K. J., FAIRLIE, L., FAUST, S. N., FENG, S., FERREIRA, D. M., FINN, A., GOODMAN,  
575 A. L., GREEN, C. M., GREEN, C. A., HEATH, P. T., HILL, C., HILL, H., HIRSCH, I., HODGSON, S. H.  
576 C., IZU, A., JACKSON, S., JENKIN, D., JOE, C. C. D., KERRIDGE, S., KOEN, A., KWATRA, G.,  
577 LAZARUS, R., LAWRIE, A. M., LELLIOTT, A., LIBRI, V., LILLIE, P. J., MALLORY, R., MENDES, A. V.  
578 A., MILAN, E. P., MINASSIAN, A. M., MCGREGOR, A., MORRISON, H., MUJADIDI, Y. F., NANA,  
579 A., O'REILLY, P. J., PADAYACHEE, S. D., PITTELLA, A., PLESTED, E., POLLOCK, K. M.,  
580 RAMASAMY, M. N., RHEAD, S., SCHWARZBOLD, A. V., SINGH, N., SMITH, A., SONG, R., SNAPE,  
581 M. D., SPRINZ, E., SUTHERLAND, R. K., TARRANT, R., THOMSON, E. C., TOROK, M. E.,  
582 TOSHNER, M., TURNER, D. P. J., VEKEMANS, J., VILLAFANA, T. L., WATSON, M. E. E.,  
583 WILLIAMS, C. J., DOUGLAS, A. D., HILL, A. V. S., LAMBE, T., GILBERT, S. C., POLLARD, A. J. &  
584 OXFORD, C. V. T. G. 2020. Safety and efficacy of the ChAdOx1 nCoV-19 vaccine (AZD1222)  
585 against SARS-CoV-2: an interim analysis of four randomised controlled trials in Brazil, South  
586 Africa, and the UK. *Lancet*.

587 VREEDE, F. T. & BROWNEE, G. G. 2007. Influenza virion-derived viral ribonucleoproteins synthesize  
588 both mRNA and cRNA in vitro. *J Virol*, 81, 2196-204.

589 VREEDE, F. T., JUNG, T. E. & BROWNEE, G. G. 2004. Model suggesting that replication of influenza  
590 virus is regulated by stabilization of replicative intermediates. *J Virol*, 78, 9568-72.

591 WALSH, E. E., FRENCK, R. W., JR., FALSEY, A. R., KITCHIN, N., ABSALON, J., GURTMAN, A., LOCKHART,  
592 S., NEUZIL, K., MULLIGAN, M. J., BAILEY, R., SWANSON, K. A., LI, P., KOURY, K., KALINA, W.,  
593 COOPER, D., FONTES-GARFIAS, C., SHI, P. Y., TURECI, O., TOMPKINS, K. R., LYKE, K. E., RAABE,  
594 V., DORMITZER, P. R., JANSEN, K. U., SAHIN, U. & GRUBER, W. C. 2020. Safety and  
595 Immunogenicity of Two RNA-Based Covid-19 Vaccine Candidates. *N Engl J Med*.

596 WANG, Y., ZHANG, D., DU, G., DU, R., ZHAO, J., JIN, Y., FU, S., GAO, L., CHENG, Z., LU, Q., HU, Y., LUO,  
597 G., WANG, K., LU, Y., LI, H., WANG, S., RUAN, S., YANG, C., MEI, C., WANG, Y., DING, D., WU,  
598 F., TANG, X., YE, X., YE, Y., LIU, B., YANG, J., YIN, W., WANG, A., FAN, G., ZHOU, F., LIU, Z., GU,  
599 X., XU, J., SHANG, L., ZHANG, Y., CAO, L., GUO, T., WAN, Y., QIN, H., JIANG, Y., JAKI, T.,  
600 HAYDEN, F. G., HORBY, P. W., CAO, B. & WANG, C. 2020. Remdesivir in adults with severe  
601 COVID-19: a randomised, double-blind, placebo-controlled, multicentre trial. *Lancet*, 395,  
602 1569-1578.

603 WASIK, M. A., EICHWALD, L., GENZEL, Y. & REICHL, U. 2018. Cell culture-based production of  
604 defective interfering particles for influenza antiviral therapy. *Appl Microbiol Biotechnol*, 102,  
605 1167-1177.

606 YANG, Y. C., LYU, T. B., ZHOU, R. N., HE, X. E., YE, K. Y., XIE, Q., ZHU, L., CHEN, T. T., SHEN, C., WU, Q.  
607 H., ZHANG, B. & ZHAO, W. 2019. The Antiviral and Antitumor Effects of Defective Interfering  
608 Particles/Genomes and Their Mechanisms. *Frontiers in Microbiology*, 10.

609 YINDA, C. K., PORT, J. R., BUSHMAKER, T., OFFEI OWUSU, I., PURUSHOTHAM, J. N., AVANZATO, V. A.,  
610 FISCHER, R. J., SCHULZ, J. E., HOLBROOK, M. G., HEBNER, M. J., ROSENKE, R., THOMAS, T.,  
611 MARZI, A., BEST, S. M., DE WIT, E., SHAI, C., VAN DOREMALEN, N. & MUNSTER, V. J. 2021.  
612 K18-hACE2 mice develop respiratory disease resembling severe COVID-19. *PLoS Pathog*, 17,  
613 e1009195.

- 614 ZHAO, H., TO, K. K. W., CHU, H., DING, Q., ZHAO, X., LI, C., SHUAI, H., YUAN, S., ZHOU, J., KOK, K. H.,  
615 JIANG, S. & YUEN, K. Y. 2018. Dual-functional peptide with defective interfering genes  
616 effectively protects mice against avian and seasonal influenza. *Nat Commun*, 9, 2358.
- 617 ZIEGLER, C. G. K., ALLON, S. J., NYQUIST, S. K., MBANO, I. M., MIAO, V. N., TZOUANAS, C. N., CAO, Y.,  
618 YOUSIF, A. S., BALS, J., HAUSER, B. M., FELDMAN, J., MUUS, C., WADSWORTH, M. H., 2ND,  
619 KAZER, S. W., HUGHES, T. K., DORAN, B., GATTER, G. J., VUKOVIC, M., TALIAFERRO, F., MEAD,  
620 B. E., GUO, Z., WANG, J. P., GRAS, D., PLAISANT, M., ANSARI, M., ANGELIDIS, I., ADLER, H.,  
621 SUCRE, J. M. S., TAYLOR, C. J., LIN, B., WAGHRAY, A., MITSIALIS, V., DWYER, D. F., BUCHHEIT,  
622 K. M., BOYCE, J. A., BARRETT, N. A., LAIDLAW, T. M., CARROLL, S. L., COLONNA, L., TKACHEV,  
623 V., PETERSON, C. W., YU, A., ZHENG, H. B., GIDEON, H. P., WINCHELL, C. G., LIN, P. L., BINGLE,  
624 C. D., SNAPPER, S. B., KROPSKI, J. A., THEIS, F. J., SCHILLER, H. B., ZARAGOSI, L. E., BARBRY, P.,  
625 LESLIE, A., KIEM, H. P., FLYNN, J. L., FORTUNE, S. M., BERGER, B., FINBERG, R. W., KEAN, L. S.,  
626 GARBER, M., SCHMIDT, A. G., LINGWOOD, D., SHALEK, A. K., ORDOVAS-MONTANES, J., LUNG-  
627 NETWORK@HUMANCELLATLAS.ORG, H. C. A. L. B. N. E. A. & NETWORK, H. C. A. L. B. 2020.  
628 SARS-CoV-2 Receptor ACE2 Is an Interferon-Stimulated Gene in Human Airway Epithelial Cells  
629 and Is Detected in Specific Cell Subsets across Tissues. *Cell*, 181, 1016-1035 e19.
- 630 ZIEGLER, C. M. & BOTTEN, J. W. 2020. Defective Interfering Particles of Negative-Strand RNA Viruses.  
631 *Trends in Microbiology*, 28, 554-565.

632
